# Supplementary material for: Modeling Therapy-Driven Evolution of Glioblastoma with Patient-Derived Xenografts
Source: MDPI journal article supplement (doi:10.3390/cancers14225494), 2022-11-09
Supplement: s1 [file s1]

**Supplementary Table S2: Most common mutated genes, by number of PDX with mutations**

| Gene     | # of PDX with mutation | Derivatives with mutations                                           |
|----------|------------------------|----------------------------------------------------------------------|
| MACF1    | 10                     | m2511, m2656, m2685, m3378, m4056, m4057, m4066, m4829, m4834, m4883 |
| TTN      | 9                      | m2657, m3098, m3378, m4057, m4082, m4829, m4834, m4883, m6161        |
| DNAH5    | 9                      | m2656, m3378, m4051, m4056, m4057, m4063, m4082, m4834, m6161        |
| SON      | 9                      | m2511, m2657, m2671, m3087, m3098, m4829, m4834, m6159, m6161        |
| OR10H4   | 9                      | m2511, m2656, m2657, m2671, m2685, m4829, m4834, m6159, m6161        |
| KLHL32   | 9                      | m2511, m2656, m2657, m2671, m2685, m4829, m4834, m6159, m6161        |
| OSBPL5   | 8                      | m4051, m4052, m4056, m4057, m4063, m4082, m4829, m4883               |
| ANKRD17  | 8                      | m2511, m2657, m2671, m3087, m3378, m4829, m4834, m6161               |
| ISM1     | 8                      | m2511, m2656, m2657, m2671, m2685, m4829, m6159, m6161               |
| USP34    | 8                      | m2511, m2657, m2671, m3087, m4829, m4834, m6159, m6161               |
| CCAR2    | 8                      | m2511, m2656, m2657, m2671, m2685, m4829, m6159, m6161               |
| CTCFL    | 8                      | m2511, m2656, m2657, m2671, m2685, m4051, m6159, m6161               |
| CLN5     | 8                      | m2511, m2656, m2657, m2671, m2685, m3378, m6159, m6161               |
| ACAN     | 7                      | m2657, m2671, m2685, m3378, m3395, m4051, m4834                      |
| DST      | 7                      | m2511, m2671, m3378, m4082, m4829, m4834, m4883                      |
| KMT2A    | 7                      | m2656, m2657, m2685, m3378, m4051, m4829, m6161                      |
| AHNAK2   | 7                      | m2671, m2685, m3378, m4051, m4056, m4829, m4834                      |
| KIAA1109 | 7                      | m2511, m2657, m2671, m2685, m4829, m4834, m6159                      |
| MUC5B    | 7                      | m2656, m2671, m2685, m4829, m4834, m4883, m6159                      |
| APC      | 7                      | m2511, m2656, m2657, m2671, m4051, m4834, m6159                      |
| KMT2C    | 7                      | m2671, m2685, m4051, m4057, m4829, m4834, m6159                      |
| NTRK3    | 7                      | m2511, m2657, m2671, m3087, m3098, m3378, m4834                      |
| CHD4     | 7                      | m2511, m2657, m4051, m4056, m4063, m4829, m4834                      |
| ZP2      | 7                      | m2511, m2656, m2657, m2671, m2685, m6159, m6161                      |
| ARID1B   | 7                      | m2656, m2657, m2671, m2685, m3378, m4834, m6161                      |
| RLN2     | 7                      | m2511, m2656, m2657, m2671, m2685, m6159, m6161                      |
| ZSWIM9   | 7                      | m2511, m2656, m2657, m2671, m2685, m6159, m6161                      |
| AHNAK    | 6                      | m2656, m2671, m2685, m3378, m4834, m4883                             |
| RNF213   | 6                      | m2657, m2671, m2685, m3378, m4063, m4834                             |
| BIRC6    | 6                      | m2511, m2671, m3087, m4829, m4834, m6161                             |
| FAT1     | 6                      | m2657, m2671, m2685, m3378, m4051, m4834                             |
| DNAH11   | 6                      | m2656, m3378, m4051, m4082, m4829, m4834                             |
| SZT2     | 6                      | m2656, m3378, m4051, m4057, m4066, m4834                             |
| MGA      | 6                      | m2671, m2685, m3087, m3378, m4051, m4834                             |
| COL12A1  | 6                      | m2656, m2657, m2671, m2685, m3098, m4834                             |
| NCOR1    | 6                      | m2657, m2671, m3378, m4057, m4834, m6159                             |
| PHF3     | 6                      | m2511, m2657, m2671, m4834, m6159, m6161                             |
| MSH6     | 6                      | m2671, m3378, m3395, m4051, m4829, m4834                             |
| UBN2     | 6                      | m2511, m2656, m2657, m2671, m4056, m4082                             |
| BRD8     | 6                      | m2511, m2685, m4052, m4834, m6159, m6161                             |
| NRP2     | 6                      | m2657, m2671, m2685, m4829, m4834, m6159                             |
| BBS9     | 6                      | m2656, m2657, m2671, m3378, m4829, m4834                             |
| ZNF724   | 6                      | m2511, m2656, m2657, m2671, m6159, m6161                             |
| KHDC4    | 6                      | m2511, m2657, m2671, m2685, m3378, m6159                             |
| HMGXB4   | 6                      | m2656, m2657, m2671, m2685, m4051, m4834                             |

|         |   |                                          |
|---------|---|------------------------------------------|
| URI1    | 6 | m2656, m2657, m2671, m4829, m6159, m6161 |
| CYP4F2  | 6 | m2671, m2685, m4829, m4834, m6159, m6161 |
| OR2B11  | 6 | m2511, m2656, m2671, m2685, m6159, m6161 |
| AQP12B  | 6 | m2511, m2657, m2671, m2685, m4829, m4834 |
| OBSCN   | 5 | m2656, m2671, m3378, m4829, m4834        |
| SYNE1   | 5 | m2671, m3378, m4057, m4829, m4834        |
| MDN1    | 5 | m2657, m2671, m2685, m4829, m4834        |
| FCGBP   | 5 | m2511, m3087, m4051, m4829, m4834        |
| ABCA13  | 5 | m2671, m3378, m4057, m4829, m4834        |
| DNHD1   | 5 | m2511, m2656, m4051, m4829, m4834        |
| VPS13D  | 5 | m2657, m2671, m2685, m4829, m4834        |
| ANK3    | 5 | m2671, m3378, m4056, m4829, m4834        |
| ALMS1   | 5 | m2671, m3378, m4057, m4829, m4834        |
| DNAH3   | 5 | m2657, m2671, m2685, m4829, m4834        |
| CMYA5   | 5 | m2685, m3378, m4051, m4057, m4829        |
| TRRAP   | 5 | m2511, m3378, m4056, m4057, m4829        |
| CSMD3   | 5 | m2671, m4829, m4834, m6159, m6161        |
| SMG1    | 5 | m2685, m3378, m4082, m4829, m4834        |
| DCHS2   | 5 | m3378, m4056, m4057, m4829, m4834        |
| LAMA1   | 5 | m2671, m3378, m4829, m4834, m4883        |
| FRYL    | 5 | m2656, m2671, m3378, m4829, m4834        |
| LRBA    | 5 | m2657, m2685, m3378, m4834, m6159        |
| CREBBP  | 5 | m3378, m4051, m4829, m4834, m6161        |
| CACNA1G | 5 | m2511, m2657, m2671, m4829, m4834        |
| PCNX1   | 5 | m2511, m3087, m3378, m4057, m4834        |
| CACNA1C | 5 | m2511, m3378, m4082, m4829, m4834        |
| CACNA1D | 5 | m2511, m4829, m4834, m6159, m6161        |
| BAZ2B   | 5 | m2657, m2685, m4051, m4056, m4834        |
| RP1     | 5 | m2657, m2671, m2685, m4057, m4834        |
| ATAD5   | 5 | m2657, m2671, m4051, m4057, m4834        |
| TNRC6B  | 5 | m2511, m2657, m4834, m6159, m6161        |
| C2CD6   | 5 | m2657, m2671, m2685, m3378, m4834        |
| ARHGEF4 | 5 | m2511, m2671, m3378, m4051, m4834        |
| MBD5    | 5 | m2657, m2671, m4829, m4834, m6159        |
| SOGA1   | 5 | m3378, m4051, m4066, m4829, m4834        |
| MROH1   | 5 | m2511, m3378, m4051, m4829, m4834        |
| C4orf50 | 5 | m2656, m2671, m4829, m4834, m6159        |
| KDM6A   | 5 | m2657, m2685, m3098, m4834, m6159        |
| TNR     | 5 | m2511, m2671, m4051, m4834, m6161        |
| SPAG9   | 5 | m2657, m2671, m2685, m3378, m4063        |
| SORBS1  | 5 | m2511, m2657, m4829, m4834, m6159        |
| KCNMA1  | 5 | m2511, m2671, m3087, m4051, m6159        |
| POM121  | 5 | m2511, m2685, m3378, m4829, m4883        |
| CSPP1   | 5 | m2657, m2671, m2685, m3378, m4834        |
| MAMDC4  | 5 | m2511, m4829, m4834, m4883, m6161        |
| SMG7    | 5 | m2657, m2685, m3087, m3378, m6159        |
| COL6A1  | 5 | m2671, m3378, m4051, m4829, m4834        |
| PPP6R2  | 5 | m2511, m2657, m2685, m4834, m6161        |
| MEIOC   | 5 | m2657, m2671, m2685, m3098, m4057        |
| WWP1    | 5 | m2671, m2685, m4829, m4834, m6161        |
| PAXBP1  | 5 | m3378, m4051, m4829, m6159, m6161        |
| MATR3   | 5 | m2511, m4082, m4834, m6159, m6161        |
| ZBTB10  | 5 | m2511, m4052, m4829, m6159, m6161        |

|          |   |                                   |
|----------|---|-----------------------------------|
| PPP4R3A  | 5 | m2671, m2685, m3378, m4057, m6161 |
| VWA5A    | 5 | m2657, m2671, m2685, m3378, m4829 |
| CNOT3    | 5 | m2511, m2657, m4829, m6159, m6161 |
| NOA1     | 5 | m2656, m2657, m2671, m2685, m4883 |
| TRAF7    | 5 | m2657, m2671, m2685, m3378, m4051 |
| ANO10    | 5 | m2656, m2657, m2671, m2685, m3378 |
| AVL9     | 5 | m2657, m2671, m2685, m4056, m4834 |
| BRD9     | 5 | m2671, m2685, m4829, m4834, m6161 |
| EBF3     | 5 | m2657, m2671, m4063, m4834, m6161 |
| ITPRIPL1 | 5 | m2656, m2657, m2671, m2685, m3395 |
| CPNE4    | 5 | m2656, m2657, m2671, m2685, m4829 |
| PTBP3    | 5 | m2671, m3087, m4834, m6159, m6161 |
| MIER2    | 5 | m4056, m4057, m4063, m4082, m4829 |
| LYN      | 5 | m2511, m2657, m2671, m6159, m6161 |
| GRSF1    | 5 | m2657, m2671, m2685, m4063, m4834 |
| FUZ      | 5 | m2657, m2671, m2685, m4829, m4834 |
| PILRA    | 5 | m2511, m2656, m2671, m4829, m6159 |
