# Supplementary material for: Modeling Therapy-Driven Evolution of Glioblastoma with Patient-Derived Xenografts
Source: MDPI journal article supplement (doi:10.3390/cancers14225494), 2022-11-09
Supplement: s1 [file s1]

**Supplementary Table S1: Therapy Regimens for Derivative PDX**

| <b>Derivative PDX</b> | <b>Parental PDX</b> | <b>RT, Days post-engraftment</b> | <b>TMZ Cycles: Days post-engraftment</b>                   |
|-----------------------|---------------------|----------------------------------|------------------------------------------------------------|
| m4052                 | GBM6                | 7-11                             | N/A                                                        |
| m4063                 | GBM6                | 7-11                             | N/A                                                        |
| m4066                 | GBM6                | 7-11                             | N/A                                                        |
| m6159                 | GBM12               | 7-11                             | N/A                                                        |
| m6161                 | GBM12               | 7-11                             | N/A                                                        |
| m3087                 | GBM43               | 7-11                             | N/A                                                        |
| m3098                 | GBM43               | 7-11                             | N/A                                                        |
| m4056                 | GBM6                | N/A                              | 7-11                                                       |
| m4057                 | GBM6                | N/A                              | 7-11                                                       |
| m4082                 | GBM6                | N/A                              | 7-11                                                       |
| m4883                 | GBM6                | N/A                              | 7-11                                                       |
| m2656                 | GBM12               | N/A                              | 7-11                                                       |
| m2657                 | GBM12               | N/A                              | 7-11                                                       |
| m3395                 | GBM6                | 7-11                             | 7-11                                                       |
| m4051                 | GBM6                | 7-11                             | 7-11                                                       |
| m2671                 | GBM12               | 7-11                             | 7-11                                                       |
| m2685                 | GBM12               | 7-11                             | 7-11                                                       |
| m2511                 | GBM12               | 7-11                             | #1: 7-11<br>#2: 45-49                                      |
| m3378                 | GBM6                | 7-11                             | #1: 27-31<br>#2: 99-103<br>#3: 155-159                     |
| m4829                 | GBM12               | N/A                              | #1: 27-31<br>#2: 48-52<br>#3: 55-59<br>#4: 97-101          |
| m4834                 | GBM12               | N/A                              | #1: 27-31<br>#2: 36-45<br>#3: 72-76<br>#4: 79-83<br>#5: 90 |
